# Supplementary material
Source: PubMed Central journal article supplement (PMC2807341)
Supplement: supp_M109.073544_jbc.M109.073544-1.pdf [file supp_M109.073544_jbc.M109.073544-1.pdf]

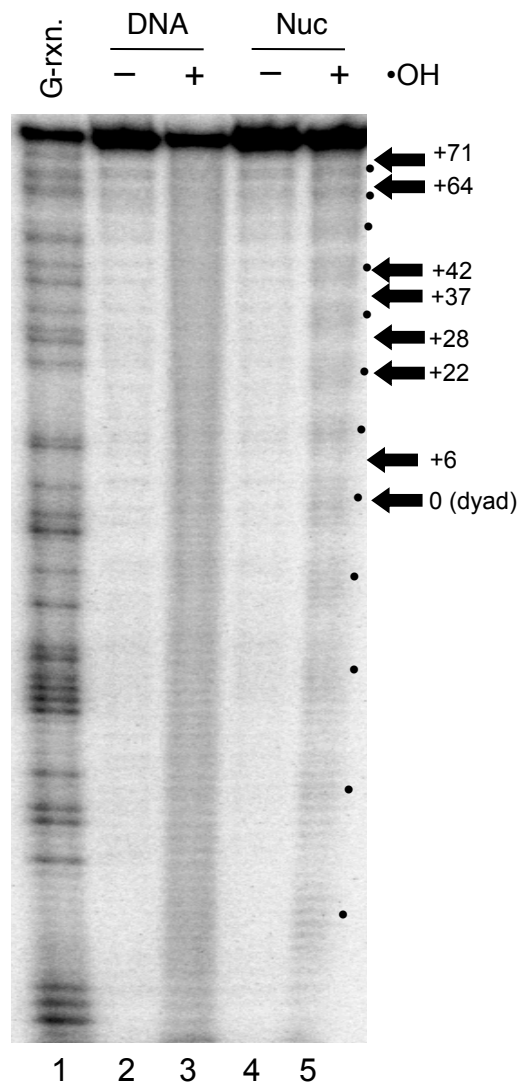

**Supplemental Fig. S1. Hydroxyl radical cleavage analysis of 154 (+22U) nucleosomes.** Samples of the reconstitution with the 154 (+22U) template were subjected to hydroxyl radical cleavage as described in the Experimental Procedures and reaction products separated on 0.7% nucleoprotein gels. DNA within the nucleosome and naked DNA bands was recovered, purified and the cleavage patterns analyzed on a 6% sequencing gel. Lane 1, G-reaction marker, lanes 2 and 3, naked DNA prepared without or with hydroxyl radical cleavage, respectively; lanes 4 and 5, nucleosome DNA prepared without or with hydroxyl radical cleavage, respectively.

**Supplemental Table S1. Oligos used to make the top strand for the 154-mer single U incorporation templates.** Sequence of oligomers shown correspond to those identified by length in Fig. 1A for construction of the top strand of the 154 bp templates. The 66-mer was used for all 154 bp constructs. The (U-less) 42-mer was ligated to individual U-containing 46-mers using the complementary 42+46 splint for the *Templates* indicated, as shown in Fig. 1. Conversely, the U-less 46-mer was ligated to the U-containing 42-mers. Each resulting 88-mer was also simultaneously ligated to the 66-mer using the 66+42 splint as diagramed in Fig. 1A. U's are shown in bold.

| Oligomer         | Sequence                                                                                      | Templates                      |
|------------------|-----------------------------------------------------------------------------------------------|--------------------------------|
| 66-mer           | AAT TCG AGC TCG CCC CGG GAT CCG GCT GGG<br>CCC CCC CCA GAA GGC AGC ACA AGG GGA GGA<br>AAA GTC | All 154 nt top strands         |
| 42-mer           | AGC CTT GTG CTC GCC TAC GGC CAT ACC ACC<br>CTG AAA GTG CCC                                    | 154U(+37), (+42), (+64), (+71) |
| 46-mer           | GAT ATC GTC TGA TCT CGG AAG CCA AGC AGG<br>GTC GGG CCT GGT TAG T                              | 154U(+22), (+28), (0), (+6)    |
| 0U 42-mer (dyad) | AGC CTT GTG <b>CU</b> C GCC TAC GGC CAT ACC ACC<br>CTG AAA GTG CCC                            | 154 0U                         |
| +6U 42-mer       | AGC CTT GTG CTC GCC <b>U</b> AC GGC CAT ACC ACC<br>CTG AAA GTG CCC                            | 154 +6U                        |
| +22U 42-mer      | AGC CTT GTG CTC GCC TAC GGC CAT ACC ACC<br><b>CU</b> G AAA GTG CCC                            | 154 +22U                       |
| +28U 42-mer      | AGC CTT GTG CTC GCC TAC GGC CAT ACC ACC<br>CTG AAA <b>GU</b> G CCC                            | 154 +28U                       |
| +37U 46-mer      | GAT <b>AUC</b> GTC TGA TCT CGG AAG CCA AGC AGG<br>GTC GGG CCT GGT TAG T                       | 154 +37U                       |
| +42U 46-mer      | GAT ATC GTC <b>UG</b> A TCT CGG AAG CCA AGC AGG<br>GTC GGG CCT GGT TAG T                      | 154 +42U                       |
| +64U 46-mer      | GAT ATC GTC TGA TCT CGG AAG CCA AGC AGG<br><b>GU</b> C GGG CCT GGT TAG                        | 154 +64U                       |
| +71U 46-mer      | GAT ATC GTC TGA TCT CGG AAG CCA AGC AGG<br>GTC GGG <b>CU</b> GGT TAG T                        | 154 +71U                       |
| 42+46 Splint     | TTC CGA GAT CAG ACG ATA TCG GGC ACT TTC<br>AGG GTG GTA T                                      | All 154 nt top-strands         |
| 66+42 Splint     | CCG TAG GCG AGC ACA AGG CTG ACT TTT CCT<br>CCC CTT GTG C                                      | All 154 nt top-strands         |

**Table S2. Oligos used to make the bottom strand for the 154-mer single U incorporation templates.** Sequence of oligomers shown correspond to those identified by length in Fig. 1A for construction of the bottom strand of the 154 bp templates. The 74-mer was ligated to the 80-mer using the complementary 74+80 splint to generate a 154 nt bottom strand. The 154-mer bottom strand was annealed to all top strands to generate the 153 bp templates as shown in Fig. 1 and described in the *Experimental Procedures*.

| Oligomer     | Sequence                                                                                                         | Template             |
|--------------|------------------------------------------------------------------------------------------------------------------|----------------------|
| 74-mer       | ACA AGG CTG ACT TTT CCT CCC CTT GTG CTG<br>CCT TCT GGG GGG GGC CCA GCC GGA TCC CGG<br>GGC GAG CTC GAA TT         | 154 nt bottom-strand |
| 80-mer       | ACT AAC CAG GCC CGA CCC TGC TTG GCT TCC<br>GAG ATC AGA CGA TAT CGG GCA CTT TCA GGG<br>TGG TAT GGC CGT AGG CGA GC | 154 nt bottom-strand |
| 74+80 Splint | GGA GGA AAA GTC AGC CTT GTG CTC GCC TAC<br>GGC CAT ACC A                                                         | 154 nt bottom-strand |

**Table S3. Oligos annealed to generate the 42 bp U-containing construct.** The +22 42-mer (Table S1, shown again here) was radiolabeled as described in the *Experimental Procedures* and annealed with a complementary 42 nt oligo to generate a 42 bp double-stranded oligonucleotide, which served as the internal naked DNA control in the UDG reactions with nucleosomes.

|                      |                                                            |                     |
|----------------------|------------------------------------------------------------|---------------------|
| +22U 42-mer          | AGC CTT GTG CTC GCC TAC GGC CAT ACC ACC<br>CUG AAA GTG CCC | +22U 42 bp ds oligo |
| 42-mer Bottom Strand | GGG CAC TTT CAG GGT GGT ATG GCC GTA GGC<br>GAG CAC AAG GCT | +22U 42 bp ds oligo |
